# Supplementary material
Source: PubMed Central journal article supplement (PMC3697729)

### *E. coli*

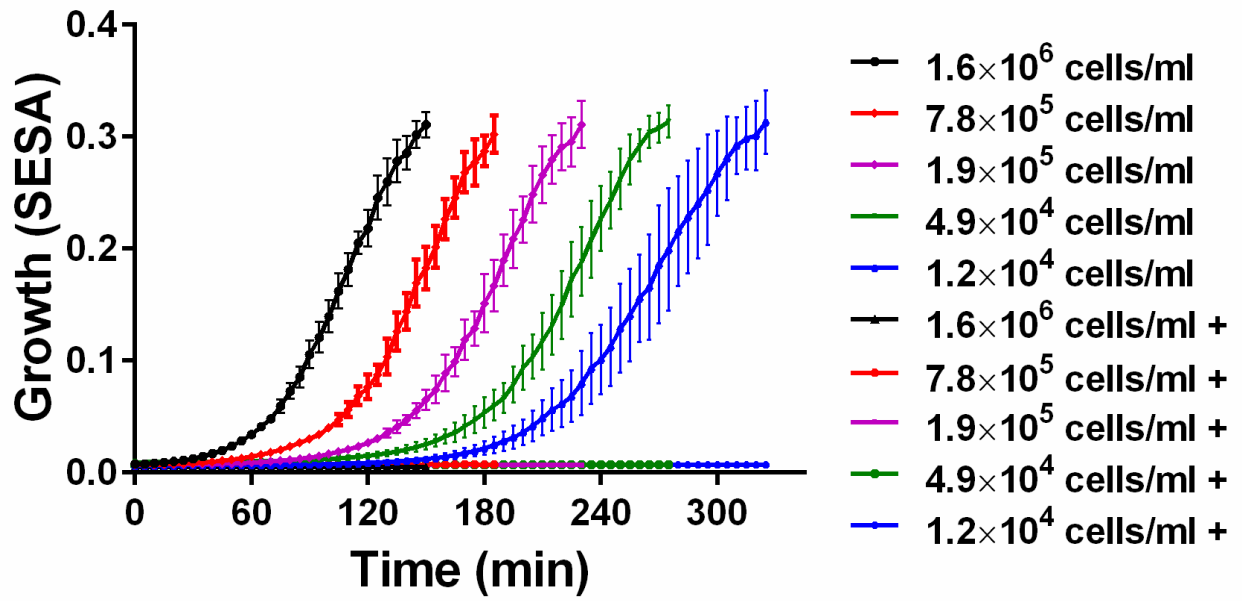

Supplement: JCM.00440-13_zjm999092587so1.pdf [file JCM.00440-13_zjm999092587so1.pdf]
